# Supplementary material
Source: PubMed Central journal article supplement (PMC3605788)
Supplement: NIHMS50447-supplement-1.pdf [file NIHMS50447-supplement-1.pdf]

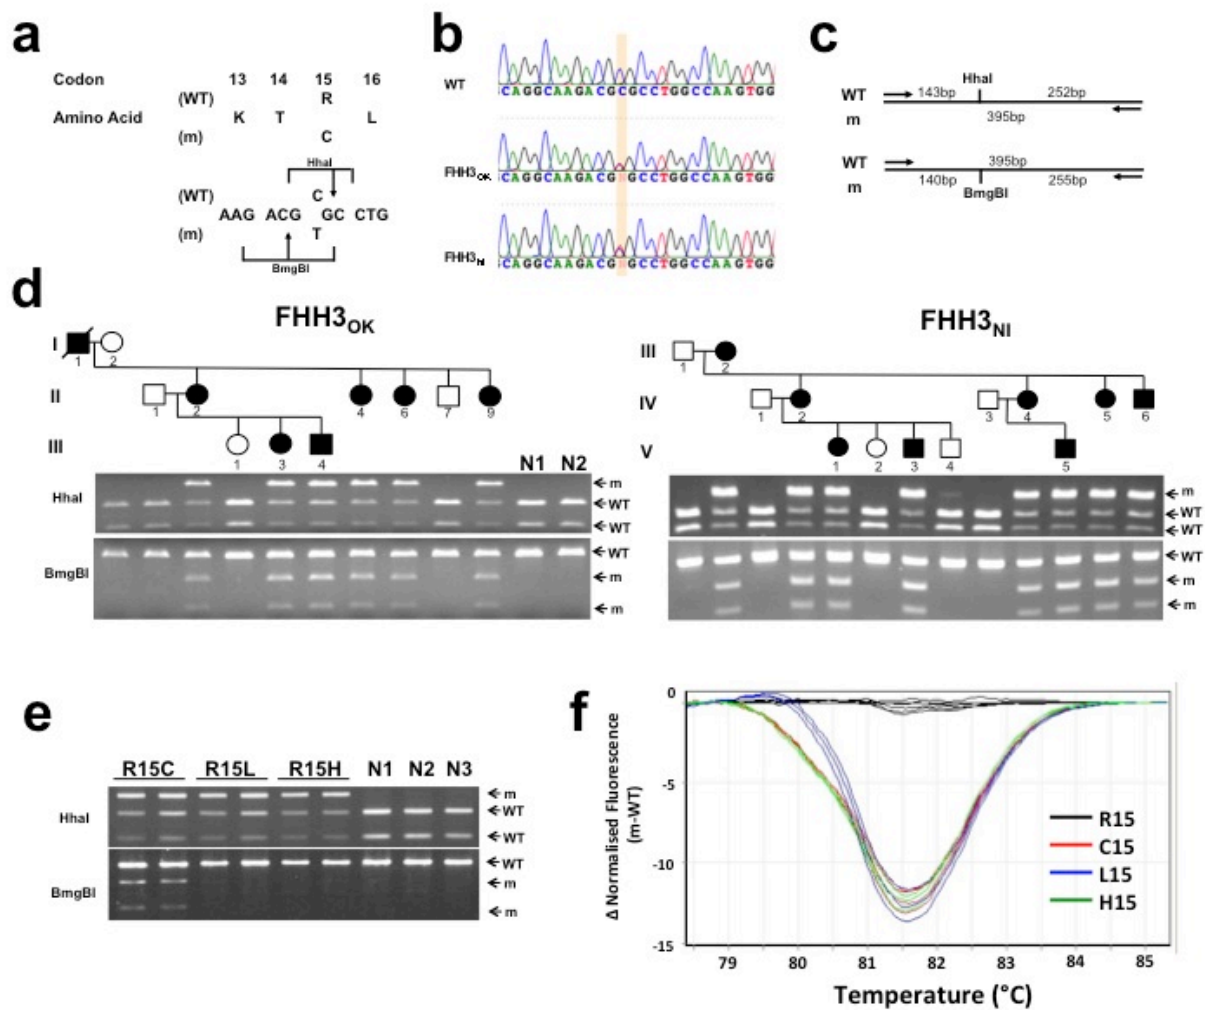

### Supplementary Figure 1. *AP2S1* mutations in FHH3.

**a**, Exome sequencing revealed a C to T transition, predicting a Arg15Cys (R15C) mutation with loss of the wild-type (WT) *HhaI* (GCG/C) site and gain of a *BmgBI* (GAC/GTG) site. **b**, Confirmation of mutation by dideoxynucleotide sequence analysis in an affected individual from each of the FHH3<sub>OK</sub> and FHH3<sub>NI</sub> kindreds<sup>6,7</sup> and its absence in an unrelated normocalcemic (wild-type, WT) individual. **c**, *HhaI* and *BmgBI* restriction map showing WT and mutant (m) PCR products following digestion. **d**, Co-segregation of *AP2S1* mutation (Arg15Cys) in the unrelated FHH3<sub>OK</sub> and FHH3<sub>NI</sub> kindreds with individuals identified using numbers previously reported<sup>6,7</sup>. The family trees are drawn so

that each individual is represented above his/her restriction fragments. All the affected individuals are heterozygous for WT and m alleles, whereas all the unaffected individuals are homozygous for WT alleles, consistent with the autosomal dominant inheritance of FHH3<sup>5-7</sup>. Male (square), female (circle), unaffected (open symbols), affected (filled symbols), and N (unrelated normals). **e**, Detection of Arg15Cys, Arg15His (R15H), and Arg15Leu (R15L) *AP2S1* mutations by *HhaI* and *BmgBI* restriction endonuclease analysis. The Arg15Leu and Arg15His *AP2S1* mutations resulted in only loss of the *HhaI* site. Two patients with each of the three *AP2S1* mutations are shown. These variants were not present in 110 alleles from 55 unrelated normocalcemic individuals (N1 to N3 shown) nor in ~5400 exomes (National Heart, Lung and Blood Institute Exome Sequencing Project), thereby indicating that these abnormalities are likely mutations of *AP2S1* and not polymorphic variants. **f**, Detection of *AP2S1* Arg15 mutations by high-resolution melt curve analysis. The *AP2S1* mutant PCR products, which formed heteroduplexes of wild-type (WT) and mutant (m) alleles, melt at lower temperatures (79-80°C) than the homoduplexes of WT *AP2S1* PCR products (>81°C), thereby facilitating their detection.

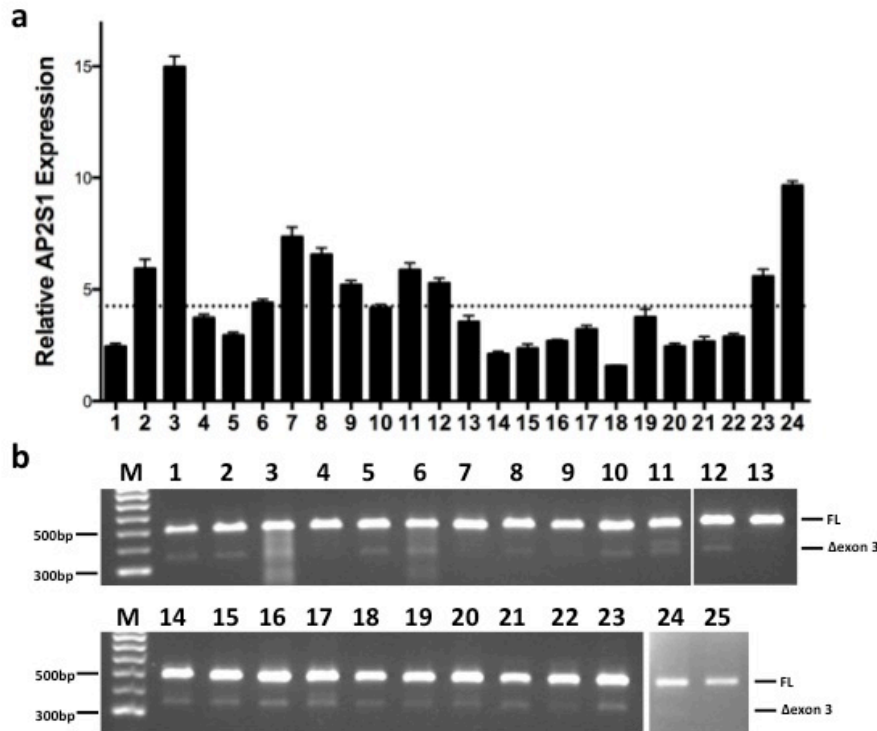

**Supplementary Figure 2. *AP2S1* expression analysis.**

a. Quantitative RT-PCR analysis of *AP2S1* expression using total RNA derived from human: 1. Adipose; 2. Bladder; 3. Brain; 4. Cervix; 5. Colon; 6. Esophagus; 7. Heart; 8. Kidney; 9. Liver; 10. Lung; 11; Ovary; 12. Placenta; 13. Prostate; 14. Skeletal Muscle; 15. Smooth Muscle; 16. Spleen; 17. Testis; 18. Thymus; 19; Thyroid; 20. Trachea; 21-23. Parathyroid adenomas; 24. HEK2993; 25. CaSR stably-transfected HEK2993. The mean relative level of *AP2S1* expression is indicated by a dotted line. *AP2S1* is ubiquitously expressed and its expression in kidney, parathyroids and HEK2993 cells is similar to that in other tissues, except brain, and approximates to that of the mean relative level of *AP2S1* expression. b. RT-PCR analysis of *AP2S1* alternative splicing in human tissues. The full-length (FL) transcript is the predominant form and the isoform lacking exon 3 ( $\Delta$ exon 3) comprises <5% of the total *AP2S1* transcript. The full-length transcript is ubiquitously expressed and the  $\Delta$ exon 3 is expressed in multiple tissues.

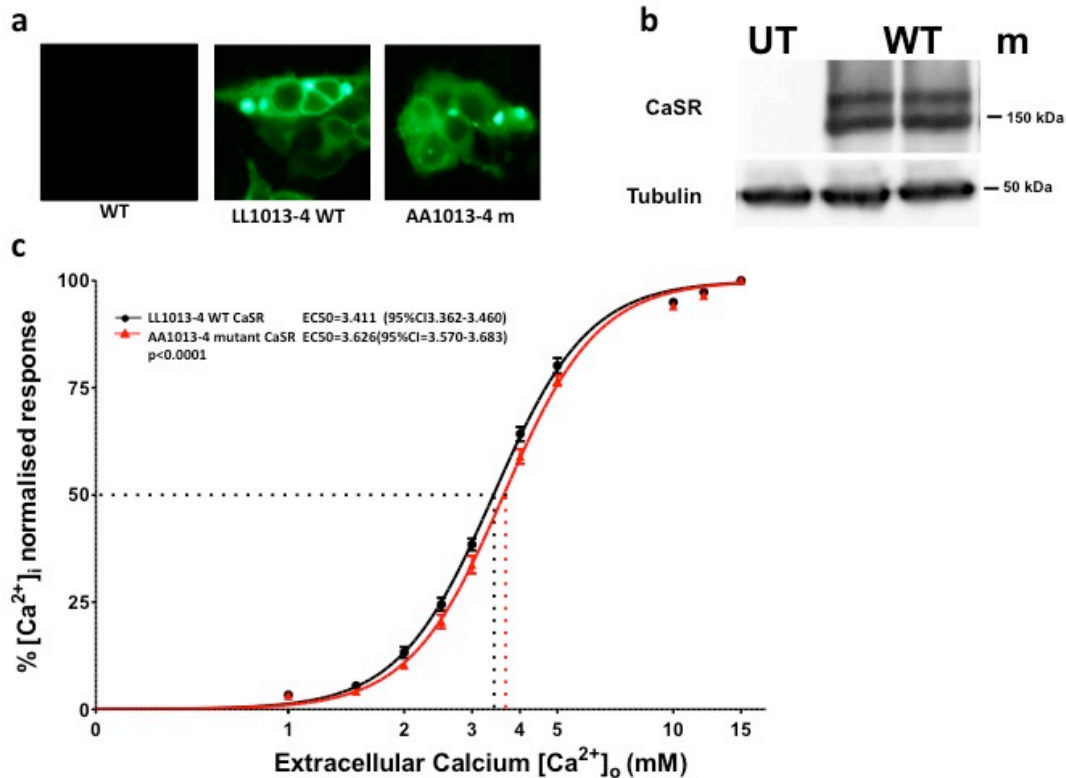

**Supplementary Figure 3. Functional expression in HEK293 cells of wild-type (WT) and mutant (m) CaSRs.**

HEK293 cells were transiently transfected with WT (LL1013-4) or mutant (m)(AA1013-4) CaSR-EGFP constructs. **a**, Fluorescence microscopy confirmed successful transfection. CaSR-EGFP expression is observed at the cell-surface and in intracellular structures but not the nucleus. UT-untransfected cells. **b**, Western blot analysis of total cell protein extracts from the HEK293 cells confirmed expression of EGFP-tagged CaSRs which was not present in UT cells. **c**, Single, live cells loaded with indo-1-acetoxymethylester, emitting fluorescence at 525nm, and hence containing transfected CaSR were selected by fluorescence-activated cell sorting, and the  $[Ca^{2+}]_o$ -evoked increases in  $[Ca^{2+}]_i$  measured. The increments in  $[Ca^{2+}]_o$  from 0 to 15mM are shown on the x-axis and the  $[Ca^{2+}]_i$  response, which was measured as a percentage of the maximum normalized response, is shown on the y-axis (mean $\pm$ SEM, n=8). The  $EC_{50}$  of the mutant CaSR was significantly

higher than that of the wild-type (mutant  $EC_{50}=3.63\text{mM}$  (95%CI=3.57-3.63mM) versus wild-type  $EC_{50}=3.41$  (95%CI=3.36-3.46)  $p<0.0001$ ), thereby indicating that removal of the CaSR dileucine motif resulted in a loss-of-function of the mutant CaSR.

### Supplementary Table 1. *AP2S1* primer sequences used for reverse-transcriptase

#### PCR (RT-PCR) and genomic amplification

| Primer                                | Sequence                      |
|---------------------------------------|-------------------------------|
| <b>RT-PCR</b>                         |                               |
| RT-F (c.83-102 in exon1)              | 5'-GAAGTCCGCTCTAGCTCTGG-3'    |
| RT-R (c.561-580 in exon 6)            | 5'-GTTTCAGCACCTTCGTCGG-3'     |
| <b>Genomic DNA PCR and Sequencing</b> |                               |
| Exon 1 Forward                        | 5'-CTGGTTCTTCAGCATCTCG-3'     |
| Exon 1 Reverse                        | 5'-CAGAGAAGGGACTTGTCAGC-3'    |
| Exon 2 Forward                        | 5'-AGCCCTATCTCCCCTCTGG-3'     |
| Exon 2 Reverse                        | 5'-GAAGCAAGCAAGCTCAAAGC-3'    |
| Exon 3 Forward                        | 5'-GAGTGAAGGAGTGAATGTTTTGG-3' |
| Exon 3 Reverse                        | 5'-AAGAAATGGAGAGGGAGAGTCC-3'  |
| Exon 4 Forward                        | 5'-AGGCTGGTCTTGCACCTCCTA-3'   |
| Exon 4 Reverse                        | 5'-AGCTGGGACACAGACCTCAG-3'    |
| Exon 5 Forward                        | 5'-ATCAGAGCCCCAGCTTCC-3'      |
| Exon 5 Reverse                        | 5'-GAAGGACTGCTGGGTTGG -3'     |

#### Supplementary Note : Clinical Data

The two previously reported FHH3 kindreds were ascertained, and these consisted of 33 affected and 22 unaffected members<sup>5,7</sup>. In addition, 50 hypercalcemic patients who have been previously reported to not have CaSR mutations, together with 55 unrelated normocalcemic individuals were ascertained<sup>9</sup>. Serum biochemical analysis was undertaken using previously described methods<sup>5,7,9</sup>.
